# Supplementary material for: Bromine anion-induced synthesis of copper nanoplates and their recyclable catalytic activity towards 4-nitrophenol reduction
Source: Royal Society of Chemistry journal article supplement (doi:10.1039/d0ce01106a), 2020-01-01
Supplement: d0ce01106a1.pdf [file d0ce01106a1.pdf]

## Electronic Supplementary Information

### Bromine anion-induced synthesis of copper nanoplates and their recyclable catalytic activity towards 4-nitrophenol reduction

Yao Li, Zhengyang Fan, Hongwei Yang\*, Ximin Yuan, Yunxiu Chao, Yuxiu Li, and Chuan Wang\*

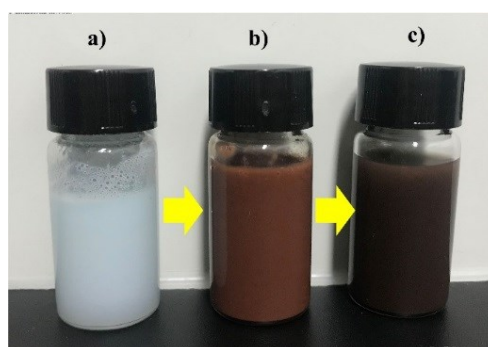

**Figure. 1S** Photographs of (a) the prepared blue emulsion before reaction. (b) The product after reaction. (c) The product after washing

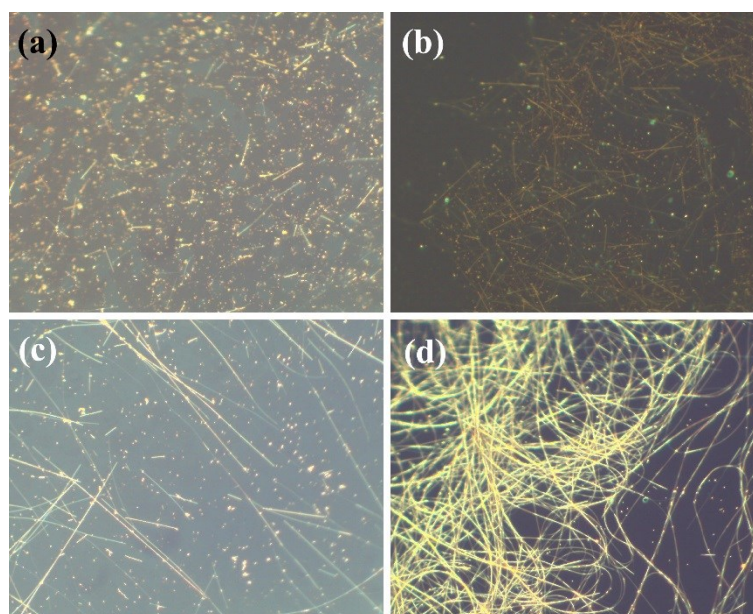

**Figure. 2S** (a) The product obtained by replacing sodium bromide with copper nitrate and sodium chloride in a molar ratio of 1:1 under other conditions unchanged. (b) The product obtained by replacing copper bromide with copper chloride under other conditions unchanged. (c) The product obtained by replacing sodium bromide with copper nitrate and sodium chloride in a molar ratio of 1:5 under other conditions unchanged. (d) The product obtained by increasing the amount of octadecylamine twice under the conditions of Fig. 2S(c).

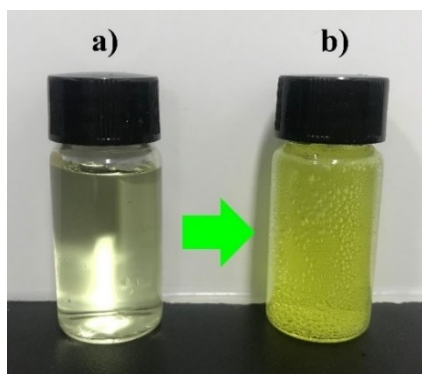

**Figure. 3S** Photographs of the pure 4-nitrophenol solution (a) before and (b) after addition of NaBH<sub>4</sub>.

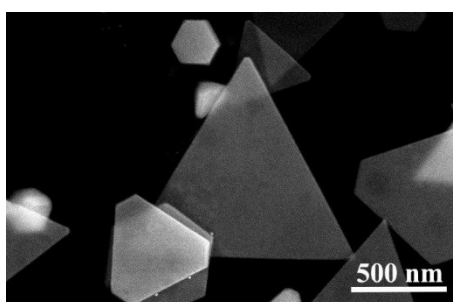

**Figure. 4S** SEM image of the copper nanoplates collected after five catalytic reaction cycles.

**Table. 1S**

Comparison of rate constants and activity factor of different catalysts for the reduction of 4-nitrophenol.

| sample                 | Quality/mg | Rate constant ( $k$ )/s <sup>-1</sup> | Activity factor ( $K$ )/s <sup>-1</sup> mg <sup>-1</sup> | Reference |
|------------------------|------------|---------------------------------------|----------------------------------------------------------|-----------|
| Cu nanoplates          | 0.052      | 0.0071                                | 0.1365                                                   | This work |
| Cu nanoplates          | 0.07       | 0.0095                                | 0.1357                                                   | 4         |
| Cu porous microspheres | 0.06       | 0.0043                                | 0.0716                                                   | 25        |
| Cu cubes               | 0.096      | 0.0101                                | 0.1052                                                   | 26        |
| Ag nanoplates/SNTs-4   | 0.270      | 0.0384                                | 0.1422                                                   | 27        |
| Au/grapheme hydrogel   | 0.024      | 0.0031                                | 0.1292                                                   | 28        |
| Pd/SPB-PS              | 0.038      | 0.0044                                | 0.1158                                                   | 29        |

## References

- [4] Y. Sun, L. Xu, Z. Yin, X. Song, J. Mater. Chem. A. 1(39) (2013) 12361-12370.
- [25] S. Gao, X. Jia, J. Yang, X. Wei, J. Mater. Chem. 22(40) (2012) 21733-21739.
- [26] P. Zhang, Y. Sui, G. Xiao, Y. Wang, C. Wang, B. Liu, G. Zou, B. Zou, J. Mater. Chem. A. 1(5) (2013) 1632-1638.
- [27] Z. Zhang, C. Shao, Y. Sun, J. Mu, M. Zhang, P. Zhang, Z. Guo, P. Liang, C. Wang and Y. Liu, J. Mater. Chem. 22(14) (2012) 1387-1395.
- [28] J. Li, C. Liu, Y. Liu, J. Mater. Chem. 22(17) (2012) 8426-8430.
- [29] M. Yu, L. Yan, P. Frank, B. Matthias, D. Markus, Chem Mater. 19(5) (2007) 1062-1069.
